# Supplementary material for: Supported nickel–iron nanocomposites as a bifunctional catalyst towards hydrogen generation from N2H4·H2O
Source: Royal Society of Chemistry journal article supplement (doi:10.1039/c3gc41939h), 2013-12-13
Supplement: c3gc41939h.pdf [file c3gc41939h.pdf]

## Supporting Information for

# Supported Nickel–Iron Nanocomposites as a Bifunctional Catalyst towards Hydrogen Generation from $\text{N}_2\text{H}_4\cdot\text{H}_2\text{O}$

Wa Gao,<sup>a</sup> Changming Li,<sup>a</sup> Hao Chen,<sup>a</sup> Min Wu,<sup>b</sup> Shan He,<sup>a</sup> Min Wei,<sup>\*a</sup> David G. Evans<sup>a</sup> and  
Xue Duan<sup>a</sup>

<sup>a</sup> State Key Laboratory of Chemical Resource Engineering, Beijing University of Chemical  
Technology, Beijing 100029, P. R. China

<sup>b</sup> Institute of High Energy Physics, Chinese Academy of Sciences, Beijing 100049, China

\* Corresponding author. Tel: +86-10-64412131; Fax: +86-10-64425385.

E-mail address: [weimin@mail.buct.edu.cn](mailto:weimin@mail.buct.edu.cn)

## 1. Experimental section

### Preparation of pristine $\text{Ni}_{1.5}\text{Fe}_{1.0}$ -alloy, Ni/MgO and Fe/MgO catalysts

NiFe-LDHs precursor with a  $\text{Ni}^{2+}/\text{Fe}^{3+}$  molar ratio of 1.5 was prepared by using SNAS method and was used as a reference sample.<sup>1</sup> The synthetic process is the same as 2.1.1 step. The product was calcined in air at 500 °C for 5 h with a heating rate of 2 °C  $\text{min}^{-1}$  (denoted as  $\text{Ni}_{1.5}\text{Fe}_{1.0}$ -MMO). After reduction by hydrogen at 500 °C for 3 h with a heating rate of 5 °C  $\text{min}^{-1}$ , the final product was labeled as  $\text{Ni}_{1.5}\text{Fe}_{1.0}$ -alloy catalyst. The reference samples Ni/MgO and Fe/MgO were synthesized by the impregnation method, in which the metal contents of Ni and Fe were controlled to be 35wt.% and 22wt.%, respectively. The commercial MgO (2g) was pretreated in a muffle furnace at 700 °C for 4 h and then impregnated in a  $\text{Ni}(\text{NO}_3)_2\cdot 6\text{H}_2\text{O}$  solution or a  $\text{Fe}(\text{NO}_3)_3\cdot 9\text{H}_2\text{O}$  solution by mechanical

agitation at 60 °C for 12 h, followed by evaporation at 60 °C until the water was removed. The resultant solid was dried at 120 °C for 12 h, calcined at 500 °C for 5 h in air (denoted as NiO/MgO and Fe<sub>2</sub>O<sub>3</sub>/MgO), and then reduced at 500 °C or 800 °C for 3 h in hydrogen to obtain 35wt.%Ni/MgO and 22wt.%Fe/MgO, respectively.

## 2. Characterization

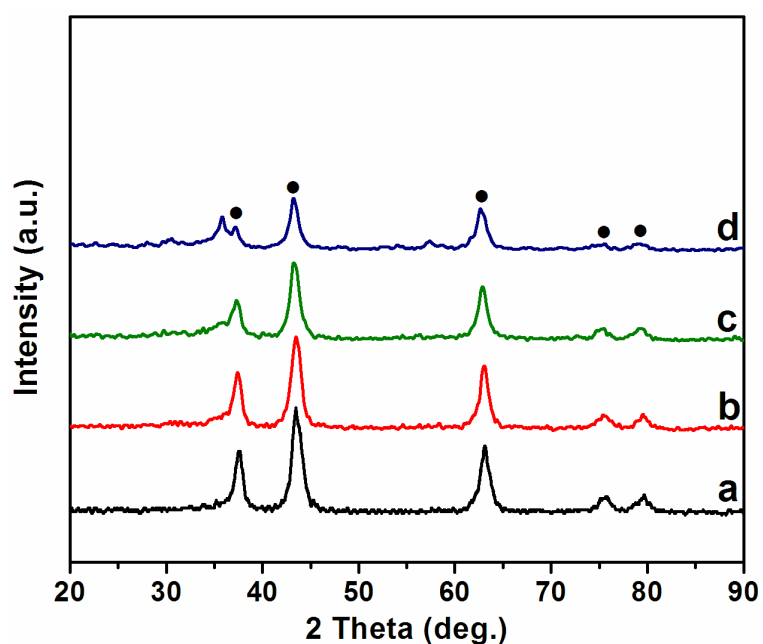

**Fig. S1** XRD patterns of Ni<sub>x</sub>Fe<sub>1.0</sub>Mg<sub>2.5</sub>-MMO samples: (a)  $x = 3.7$ , (b)  $x = 2.5$ , (c)  $x = 1.5$ , (d)  $x = 0.4$ .

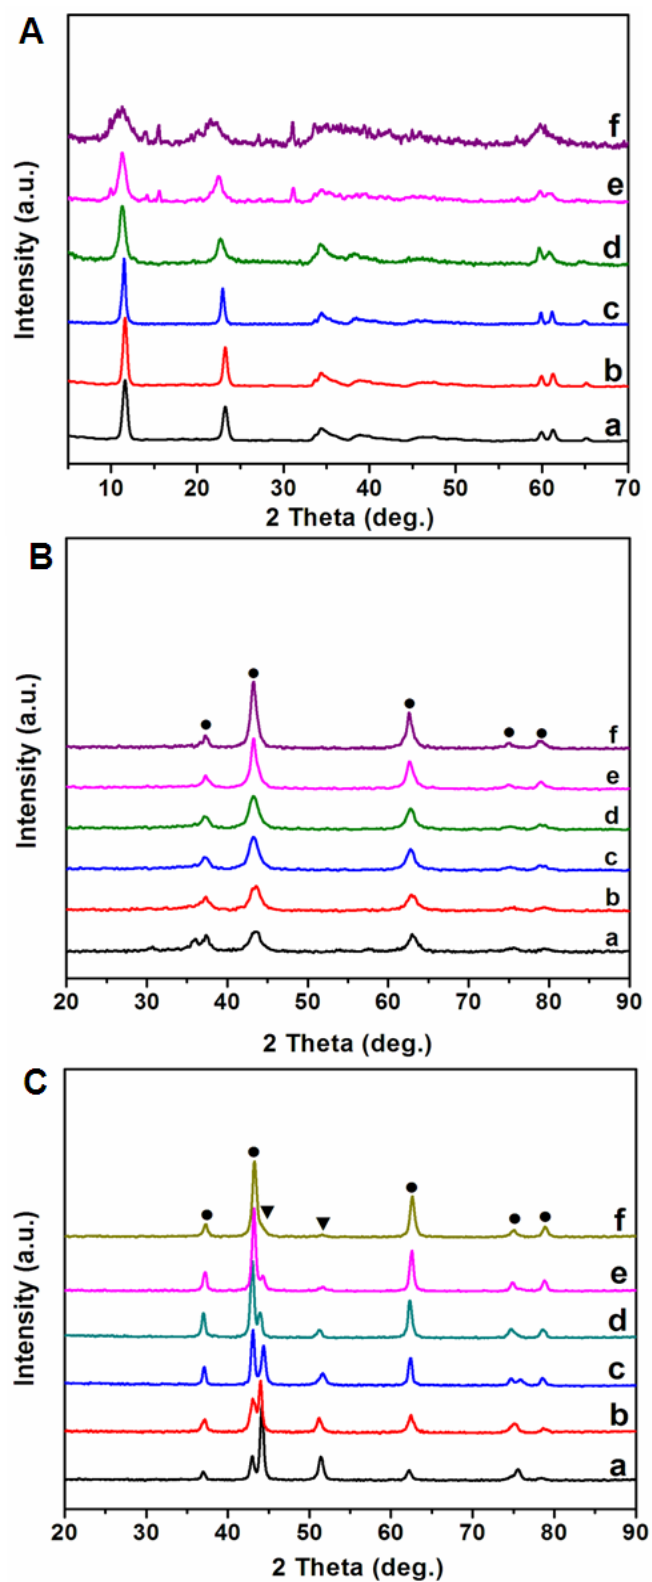

**Fig. S2** XRD patterns of (A)  $\text{Ni}_{1.5}\text{Fe}_{1.0}\text{Mg}_z\text{-LDHs}$  precursors, (B)  $\text{Ni}_{1.5}\text{Fe}_{1.0}\text{Mg}_z\text{-MMO}$  samples, (C)  $\text{Ni}_{1.5}\text{Fe}_{1.0}\text{-alloy}/(\text{MgO})_z$  samples: (a)  $z = 0.6$ , (b)  $z = 1.4$ , (c)  $z = 2.5$ , (d)  $z = 3.5$ , (e)  $z = 5.0$ , (f)  $z = 10.0$ . Crystalline phase: (●) MgO,  $\text{Mg}(\text{Ni}, \text{Fe})\text{O}$ , (▼) NiFe alloy.

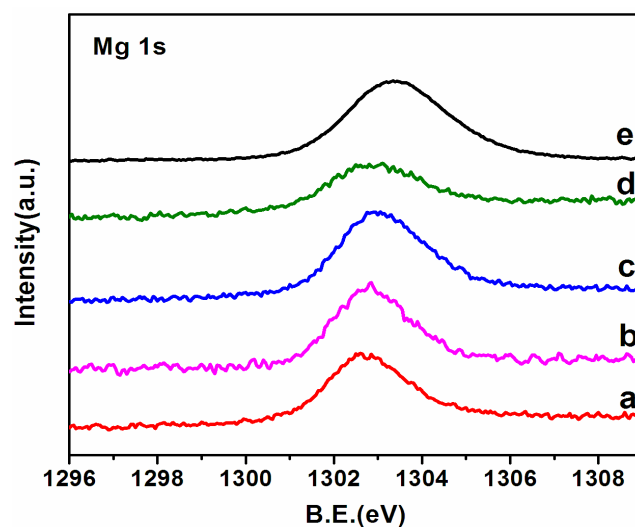

**Fig. S3** Mg 1s XPS spectra of  $\text{Ni}_x\text{Fe}_{1.0}\text{-alloy}/(\text{MgO})_{2.5}$  samples: (a)  $x = 0.4$ , (b)  $x = 1.5$ , (c)  $x = 2.5$ , (d)  $x = 3.7$ , (e) MgO.

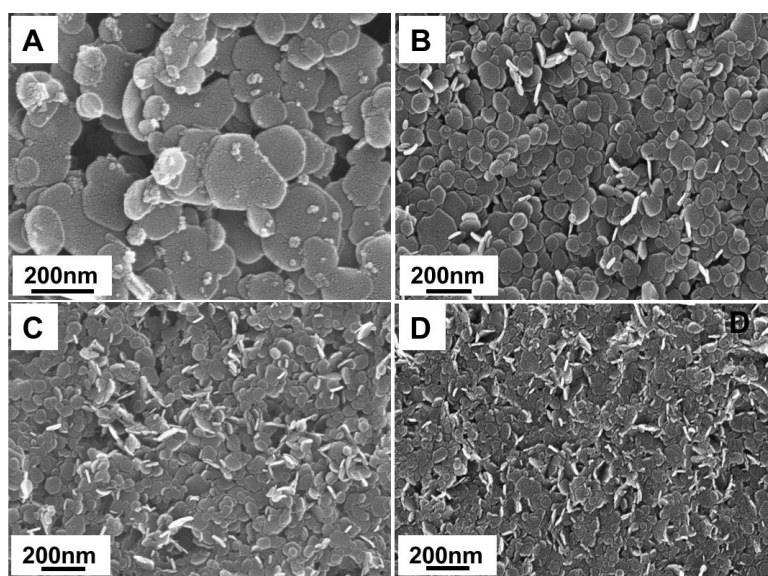

**Fig. S4** SEM images of the  $\text{Ni}_x\text{Fe}_{1.0}\text{Mg}_{2.5}\text{-LDHs}$  precursors: (a)  $x = 0.4$ , (b)  $x = 1.5$ , (c)  $x = 2.5$ , (d)  $x = 3.7$ .

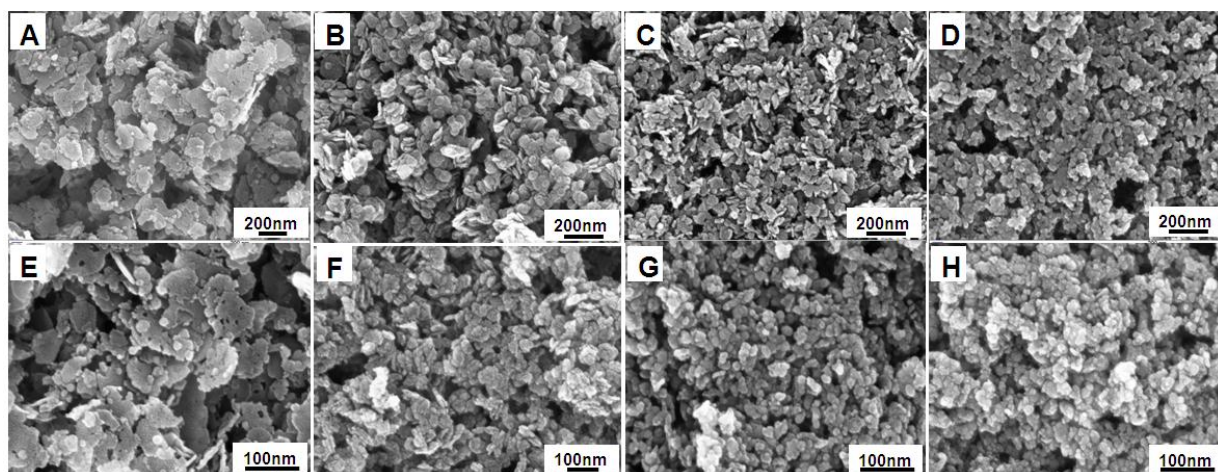

**Fig. S5** (A-D) SEM images of the  $\text{Ni}_x\text{Fe}_{1.0}\text{Mg}_{2.5}\text{-MMO}$  samples; (E-H) SEM images of the  $\text{Ni}_x\text{Fe}_{1.0}\text{-alloy}/(\text{MgO})_{2.5}$ : (a)  $x = 0.4$ , (b)  $x = 1.5$ , (c)  $x = 2.5$ , (d)  $x = 3.7$ .

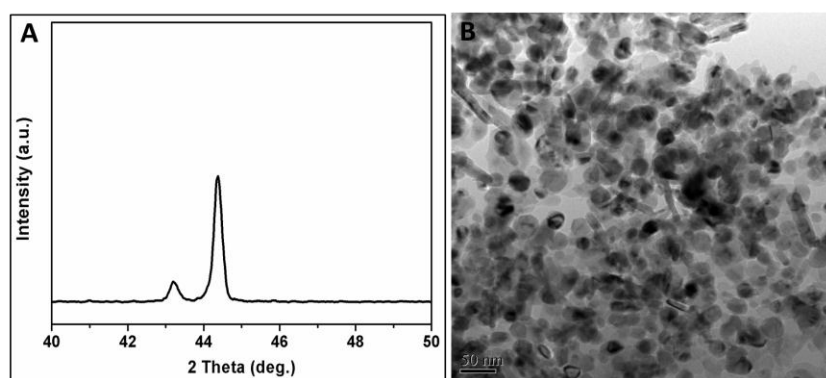

**Fig. S6** (A) XRD pattern and (B) HRTEM image of the used  $\text{Ni}_{1.5}\text{Fe}_{1.0}\text{-alloy}/(\text{MgO})_{3.5}$  catalyst.

**Table S1** Metal contents in the  $\text{Ni}_{1.5}\text{Fe}_{1.0}\text{-alloy}/(\text{MgO})_z$  samples determined by ICP-AES

| Catalysts                                            | Metal content (wt.%) |      |
|------------------------------------------------------|----------------------|------|
|                                                      | Ni                   | Fe   |
| $\text{Ni}_{1.5}\text{Fe}_{1.0}/(\text{MgO})_{0.6}$  | 58.9                 | 37.3 |
| $\text{Ni}_{1.5}\text{Fe}_{1.0}/(\text{MgO})_{1.4}$  | 43.8                 | 28.0 |
| $\text{Ni}_{1.5}\text{Fe}_{1.0}/(\text{MgO})_{2.5}$  | 35.4                 | 22.4 |
| $\text{Ni}_{1.5}\text{Fe}_{1.0}/(\text{MgO})_{3.5}$  | 29.5                 | 18.6 |
| $\text{Ni}_{1.5}\text{Fe}_{1.0}/(\text{MgO})_{5.0}$  | 23.6                 | 14.9 |
| $\text{Ni}_{1.5}\text{Fe}_{1.0}/(\text{MgO})_{10.0}$ | 14.2                 | 8.9  |

**Table S2** Metal contents in various catalysts determined by XPS

| Catalysts                                                  | Surface metal Content (at.%) |      |
|------------------------------------------------------------|------------------------------|------|
|                                                            | Ni                           | Fe   |
| Ni/MgO                                                     | 7.65                         | —    |
| Fe/MgO                                                     | —                            | 5.26 |
| Ni <sub>0.4</sub> Fe <sub>1.0</sub> /(MgO) <sub>2.5</sub>  | 4.2                          | 6.89 |
| Ni <sub>1.5</sub> Fe <sub>1.0</sub> /(MgO) <sub>2.5</sub>  | 7.85                         | 5.07 |
| Ni <sub>2.5</sub> Fe <sub>1.0</sub> /(MgO) <sub>2.5</sub>  | 7.75                         | 4.77 |
| Ni <sub>3.7</sub> Fe <sub>1.0</sub> /(MgO) <sub>2.5</sub>  | 8.64                         | 3.31 |
| Ni <sub>1.5</sub> Fe <sub>1.0</sub> /(MgO) <sub>0.6</sub>  | 8.07                         | 7.18 |
| Ni <sub>1.5</sub> Fe <sub>1.0</sub> /(MgO) <sub>1.4</sub>  | 7.98                         | 6.62 |
| Ni <sub>1.5</sub> Fe <sub>1.0</sub> /(MgO) <sub>2.5</sub>  | 7.85                         | 5.07 |
| Ni <sub>1.5</sub> Fe <sub>1.0</sub> /(MgO) <sub>3.5</sub>  | 7.06                         | 4.68 |
| Ni <sub>1.5</sub> Fe <sub>1.0</sub> /(MgO) <sub>5.0</sub>  | 5.37                         | 4.89 |
| Ni <sub>1.5</sub> Fe <sub>1.0</sub> /(MgO) <sub>10.0</sub> | 3.06                         | 2.32 |

**Table S3** Reduction Degree and specific surface area of the NiFe alloy particles in the Ni<sub>x</sub>Fe<sub>1.0</sub>/(MgO)<sub>2.5</sub> and Ni<sub>1.5</sub>Fe<sub>1.0</sub>/(MgO)<sub>z</sub> catalysts

| Catalysts                                                  | Ni/Fe/MgO ratio <sup>a</sup> | Reduction degree (%) <sup>b</sup> |    | Specific surface area (m <sup>2</sup> g <sup>-1</sup> ) <sup>c</sup> |
|------------------------------------------------------------|------------------------------|-----------------------------------|----|----------------------------------------------------------------------|
|                                                            |                              | Ni                                | Fe |                                                                      |
|                                                            |                              |                                   |    |                                                                      |
| Ni <sub>0.4</sub> Fe <sub>1.0</sub> /(MgO) <sub>2.5</sub>  | 0.39:0.98:2.47               | 62                                | 55 | 78                                                                   |
| Ni <sub>1.5</sub> Fe <sub>1.0</sub> /(MgO) <sub>2.5</sub>  | 1.52:0.96:2.49               | 65                                | 61 | 70                                                                   |
| Ni <sub>2.5</sub> Fe <sub>1.0</sub> /(MgO) <sub>2.5</sub>  | 2.53:0.95:2.51               | 69                                | 58 | 68                                                                   |
| Ni <sub>3.7</sub> Fe <sub>1.0</sub> /(MgO) <sub>2.5</sub>  | 3.68:1.03:2.50               | 73                                | 66 | 62                                                                   |
| Ni <sub>1.5</sub> Fe <sub>1.0</sub> /(MgO) <sub>0.6</sub>  | 1.48:0.98:0.59               | 58                                | 56 | 82                                                                   |
| Ni <sub>1.5</sub> Fe <sub>1.0</sub> /(MgO) <sub>1.4</sub>  | 1.52:0.96:1.49               | 62                                | 60 | 78                                                                   |
| Ni <sub>1.5</sub> Fe <sub>1.0</sub> /(MgO) <sub>2.5</sub>  | 1.52:0.96:2.49               | 65                                | 61 | 70                                                                   |
| Ni <sub>1.5</sub> Fe <sub>1.0</sub> /(MgO) <sub>3.5</sub>  | 1.46:1.03:3.50               | 60                                | 58 | 69                                                                   |
| Ni <sub>1.5</sub> Fe <sub>1.0</sub> /(MgO) <sub>5.0</sub>  | 1.47:1.01:5.03               | 68                                | 58 | 60                                                                   |
| Ni <sub>1.5</sub> Fe <sub>1.0</sub> /(MgO) <sub>10.0</sub> | 1.51:1.02:9.96               | 59                                | 55 | 56                                                                   |

<sup>a</sup>Determined by ICP-AES. <sup>b</sup>Calculated by O<sub>2</sub> consumption from TPO. <sup>c</sup>Calculated from the volume of chemisorbed H<sub>2</sub>.

## References

[1] Y. Zhao, F. Li, R. Zhang, D. G. Evans and X. Duan, *Chem. Mater.*, 2002, **14**, 4286.
